# Supplementary material
Source: Springer Nature journal article supplement (https://www.springermedizin.de/resource/supplementary/12874_2014_1154_MOESM5_ESM.docx/9433372)

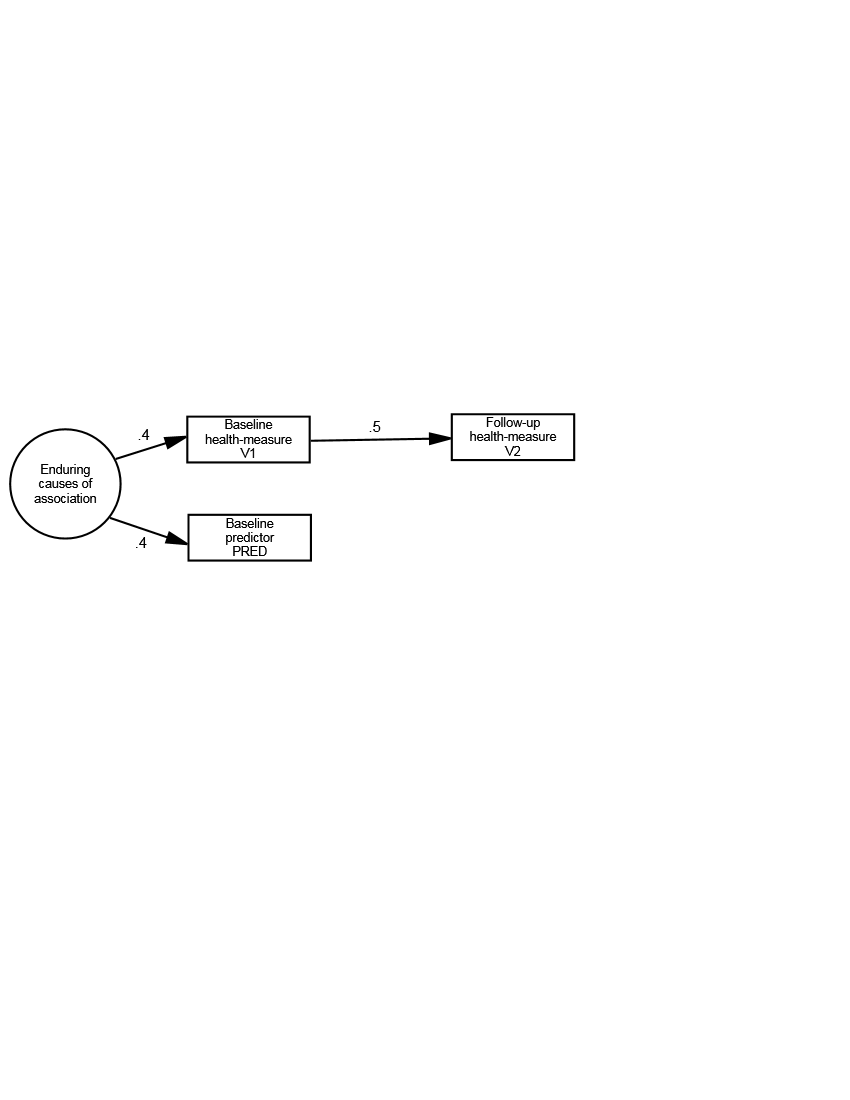

Supplement: MOESM5 [file 9433372]
